# Supplementary material
Source: publisher site journal article supplement (https://www.dovepress.com/get_supplementary_file.php?f=232449.docx)
Supplement: Supplementary file 1 [file get_supplementary_file.php]

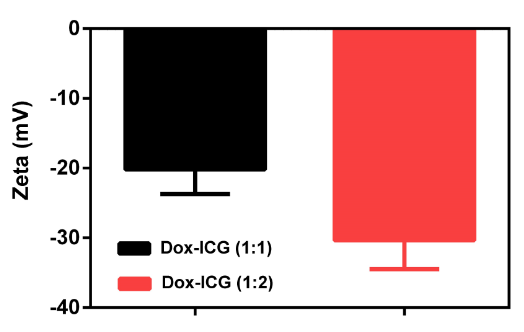


**Figure S1** Zeta potential of Dox-ICG (Dox/ICG= 1: 1and 1: 2)


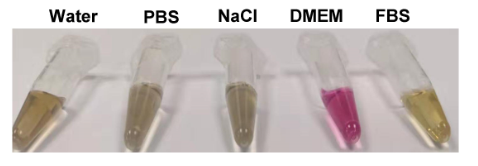


**Figure S2** Stability of the Au-ICG in water, PBS, NaCl, FBS and DMEM, respectively.


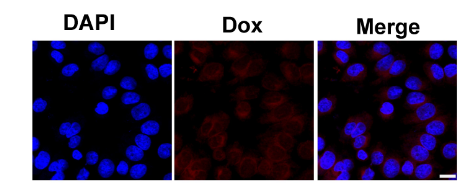


**Figure S3** CLSM images of free Dox incubated SCG 7901/VCR cells. Scale bar: 50 μm.
